# Supplementary material
Source: PubMed Central journal article supplement (PMC3754285)
Supplement: AAC.00493-13_zac999102092so1.pdf [file AAC.00493-13_zac999102092so1.pdf]

Supplementary table 1a. MIC-values and susceptibility of the population and sequencing results for the start and ciprofloxacin-treated populations of PAO1, PAO $\Delta$ mutS (*mutS*) and PAOMY-Mgm (*mutMY*).

|                      | MIC and susceptibility of population ( $\mu$ g/ml) | MIC of resistant colonies ( $\mu$ g/mL) | <i>nfxB</i><br>NfxB            | <i>gyrA</i><br>GyrA  | <i>gyrB</i><br>GyrB    | <i>parC</i><br>ParC | <i>parE</i><br>ParE |
|----------------------|----------------------------------------------------|-----------------------------------------|--------------------------------|----------------------|------------------------|---------------------|---------------------|
| PAO1 start           | 0.19, dz <sup>a</sup> -, (-)                       | - <sup>b</sup>                          | nc <sup>c</sup>                | nc                   | nc                     | nc                  | nc                  |
| PAO1 A, Cip, day 3   | 1.75, dz -, (-)                                    | -                                       | -                              | -                    | -                      | -                   | -                   |
| PAO1 B, Cip, day 3   | 1.5, dz -, (-)                                     | -                                       | -                              | -                    | -                      | -                   | -                   |
| PAO1 C, Cip, day 3   | 1.5, dz -, (-)                                     | -                                       | -                              | -                    | -                      | -                   | -                   |
| PAO1 A, Cip, day 10  | 1.5, dz -, (+++)                                   | 32                                      | <i>del C pos. 6</i><br>stop    | <i>C248T</i><br>T83I | nc                     | nc                  | Nc                  |
| PAO1 B, Cip, day 10  | 1, dz 3, (+)                                       | 8                                       | nc                             | <i>G259T</i><br>D87Y | nc                     | nc                  | Nc                  |
| PAO1 C, Cip, day 10  | 1, dz -, (++)                                      | 16                                      | <i>336 ins G</i><br>Frameshift | nc                   | <i>C1397A</i><br>S466Y | nc                  | Nc                  |
| PAO1 A, Cip, day 17  | 1.5, dz -, (+++)                                   | 32                                      | nc                             | <i>C248T</i><br>T83I | nc                     | nc                  | Nc                  |
| PAO1 B, Cip, day 17  | 0.5, dz 4, (+)                                     | 16                                      | <i>del C pos. 6</i><br>stop    | <i>G259T</i><br>D87Y | nc                     | nc                  | Nc                  |
| PAO1 C, Cip, day 17  | 1.5, dz -, (+++)                                   | 16                                      | <i>G461A</i><br>G154D          | nc                   | <i>C1397A</i><br>S466Y | nc                  | Nc                  |
| PAO1 A, Cip, day 24* | 1.5, dz -, (+++)                                   | 32                                      | nc                             | <i>C248T</i><br>T83I | nc                     | nc                  | Nc                  |
| PAO1 B, Cip, day 24  | 0.75, dz 4, (++)                                   | 16                                      | <i>G436A</i><br>E146K          | <i>G259T</i><br>D87Y | nc                     | nc                  | Nc                  |
| PAO1 C, Cip, day 24* | 1.5, dz 12, (+)                                    | 8                                       | <i>G461A</i><br>G154D          | nc                   | <i>C1397A</i><br>S466Y | nc                  | Nc                  |
| PAO1 A, Cip, day 94  | 1.5, dz 8, (+)                                     | 32                                      | nc                             | <i>C248T</i><br>T83I | nc                     | nc                  | Nc                  |
| PAO1 B, Cip, day 94  | 1.5, dz 4, (++)                                    | 16                                      | nc                             | <i>G259T</i><br>D87Y | nc                     | nc                  | Nc                  |
| PAO1 C Cip, day 94   | 4, dz 6, (++)                                      | 32                                      | nc                             | <i>G259T</i><br>D87Y | <i>C1397A</i><br>S466Y | nc                  | Nc                  |

|                            | MIC and susceptibility of population ( $\mu\text{g/ml}$ ) | MIC of resistant colonies ( $\mu\text{g/mL}$ ) | <i>nfxB</i><br>NfxB | <i>gyrA</i><br>GyrA | <i>gyrB</i><br>GyrB | <i>parC</i><br>ParC | <i>parE</i><br>ParE |
|----------------------------|-----------------------------------------------------------|------------------------------------------------|---------------------|---------------------|---------------------|---------------------|---------------------|
| <i>mutS</i> start          | 0.19, dz -, (+++) <sup>d</sup>                            | -                                              | nc                  | nc                  | nc                  | nc                  | Nc                  |
| <i>mutS</i> A, Cip, day 3  | 1.5, dz 8, (+)                                            | 64                                             | C434T<br>T145I      | C248T<br>T83I       | nc                  | nc                  | Nc                  |
| <i>mutS</i> B, Cip, day 3  | 1, dz 8, (++)                                             | 64                                             | nc                  | C248T<br>T83I       | nc                  | nc                  | Nc                  |
| <i>mutS</i> C, Cip, day 3  | 1, dz 4, (++)                                             | 64                                             | nc                  | C248T<br>T83I       | nc                  | nc                  | Nc                  |
| <i>mutS</i> A, Cip, day 10 | 1.5, dz 12, (+)                                           | 64                                             | nc                  | C248T<br>T83I       | nc                  | nc                  | Nc                  |
| <i>mutS</i> B, Cip, day 10 | 1.5, dz 12, (+)                                           | 64-128                                         | G538A<br>G180S      | C248T<br>T83I       | nc                  | nc                  | Nc                  |
| <i>mutS</i> C, Cip, day 10 | 1.5, dz 16, (++)                                          | 64                                             | G461A<br>G154D      | C248T<br>T83I       | nc                  | nc                  | Nc                  |
| <i>mutS</i> A, Cip, day 17 | 1.5, dz 12, (++)                                          | 64                                             | nc                  | C248T<br>T83I       | nc                  | nc                  | Nc                  |
| <i>mutS</i> B, Cip, day 17 | 4, dz 16, (+)                                             | 64                                             | G538A<br>G180S      | C248T<br>T83I       | nc                  | nc                  | Nc                  |
| <i>mutS</i> C, Cip, day 17 | 3, dz 12, (++)                                            | 64                                             | nc                  | C248T<br>T83I       | nc                  | nc                  | Nc                  |
| <i>mutS</i> A, Cip, day 24 | 3, dz 24, (+)                                             | 64                                             | G461A<br>G154D      | C248T<br>T83I       | nc                  | nc                  | Nc                  |
| <i>mutS</i> B, Cip, day 24 | 4, dz 16, (+)                                             | 64                                             | nc                  | C248T<br>T83I       | nc                  | nc                  | Nc                  |
| <i>mutS</i> C, Cip, day 24 | 3, dz 8, (++)                                             | 128                                            | nc                  | C248T<br>T83I       | nc                  | nc                  | Nc                  |
| <i>mutS</i> A, Cip day 94  | 8, dz 8, (++)                                             | 128                                            | nc                  | C248T<br>T83I       | nc                  | C260T<br>S87L       | Nc                  |
| <i>mutS</i> B, Cip day 94  | 4, dz -, (+++)                                            | 128                                            | nc                  | C248T<br>T83I       | nc                  | nc                  | Nc                  |
| <i>mutS</i> C, Cip day 94  | 4, dz 16, (++)                                            | 128                                            | T499C<br>S167P      | C248T<br>T83I       | nc                  | C260T<br>S87L       | Nc                  |

|                             | MIC and susceptibility of population ( $\mu\text{g/ml}$ ) | MIC of resistant colonies ( $\mu\text{g/mL}$ ) | <i>nfxB</i><br>NfxB | <i>gyrA</i><br>GyrA | <i>gyrB</i><br>GyrB | <i>parC</i><br>ParE | <i>parE</i><br>ParE |
|-----------------------------|-----------------------------------------------------------|------------------------------------------------|---------------------|---------------------|---------------------|---------------------|---------------------|
| <i>mutMY</i> start          | 0.19, dz -, (+++) <sup>d</sup>                            | -                                              | nc                  | nc                  | nc                  | nc                  | Nc                  |
| <i>mutMY</i> A, Cip, day 3  | 1.5, dz -, (++)                                           | 16                                             | C473A<br>A158E      | nc                  | C1397A<br>S466Y     | nc                  | Nc                  |
| <i>mutMY</i> B, Cip, day 3  | 1, dz -, (++)                                             | 16                                             | G538T<br>G180C      | G259T<br>D87Y       | nc                  | nc                  | Nc                  |
| <i>mutMY</i> C, Cip, day 3  | 1.5, dz -, (+++)                                          | 16                                             | nc                  | G259T<br>D87Y       | nc                  | nc                  | Nc                  |
| <i>mutMY</i> A, Cip, day 10 | 1, dz 6, (++)                                             | 16                                             | nc                  | nc                  | C1397A<br>S466Y     | nc                  | Nc                  |
| <i>mutMY</i> B, Cip, day 10 | 1.5, dz 6, (++)                                           | 16                                             | G538T<br>G180C      | G259T<br>D87Y       | nc                  | nc                  | Nc                  |
| <i>mutMY</i> C, Cip, day 10 | 1.5, dz 8, (+)                                            | 16                                             | nc                  | G259T<br>D87Y       | nc                  | nc                  | Nc                  |
| <i>mutMY</i> A, Cip, day 17 | 3, dz 12, (+)                                             | 16                                             | G538T<br>G180C      | nc                  | C1397A<br>S466Y     | nc                  | Nc                  |
| <i>mutMY</i> B, Cip, day 17 | 1.5, dz 12, (++)                                          | 16                                             | G538T<br>G180C      | G259T<br>D87Y       | nc                  | nc                  | Nc                  |
| <i>mutMY</i> C, Cip, day 17 | 6, dz 16, (+)                                             | 16                                             | nc                  | G259T<br>D87Y       | nc                  | nc                  | Nc                  |
| <i>mutMY</i> A, Cip, day 24 | 6, dz 16, (+)                                             | 16                                             | G539T<br>G180V      | G259T<br>D87Y       | nc                  | nc                  | Nc                  |
| <i>mutMY</i> B, Cip, day 24 | 4, dz 12, (++)                                            | 16                                             | nc                  | G259T<br>D87Y       | nc                  | nc                  | Nc                  |
| <i>mutMY</i> C, Cip, day 24 | 6, dz 12, (+)                                             | 16                                             | nc                  | G259T<br>D87Y       | nc                  | nc                  | Nc                  |
| <i>mutMY</i> A, Cip, day 94 | 2, dz -, (+++)                                            | 8                                              | G140T<br>R47L       | nc                  | C1397A<br>S466Y     | nc                  | Nc                  |
| <i>mutMY</i> B, Cip, day 94 | 2, dz -, (+++)                                            | 32                                             | nc                  | G259T<br>D87Y       | nc                  | nc                  | Nc                  |
| <i>mutMY</i> C, Cip, day 94 | 6, dz -, (++)                                             | 32                                             | C495A<br>A165D      | G259T<br>D87Y       | nc                  | nc                  | Nc                  |

<sup>a</sup>double zone, <sup>b</sup>not determined, <sup>c</sup>no change, <sup>d</sup>*nfxB*, *gyrA* and *gyrB* sequences are shown in supplementary table 2. \*Interpretation of bacterial population in figure 1.

Supplementary table 1b. MIC-values and susceptibility of the population and sequencing results for the start and control populations of PAO1, PAO $\Delta$ mutS (*mutS*) and PAOMY-Mgm (*mutMY*).

|                | <b>MIC and susceptibility of population (<math>\mu</math>g/ml)</b> | <b>MIC of resistant colonies (<math>\mu</math>g/mL)</b> | <b><i>nfxB</i><br/>NfxB</b> | <b><i>gyrA</i><br/>GyrA</b> | <b><i>gyrB</i><br/>GyrB</b> |
|----------------|--------------------------------------------------------------------|---------------------------------------------------------|-----------------------------|-----------------------------|-----------------------------|
| PAO1 start     | 0.19, dz -, (-)                                                    | -                                                       | nc                          | nc                          | nc                          |
| PAO1 A, day 3  | 0.19<br>dz -<br>(-)                                                | -                                                       | -                           | -                           | -                           |
| PAO1 B, day 3  | 0.094<br>dz -<br>(+) 16                                            | 0.19<br>dz 6                                            | nc                          | nc                          | nc                          |
| PAO1 C, day 3  | 0.125<br>dz -<br>(-)                                               | -                                                       | -                           | -                           | -                           |
| PAO1 A, day 10 | 0.19<br>dz -<br>(+) 0.75                                           | 0.25                                                    | nc                          | nc                          | nc                          |
| PAO1 B, day 10 | 0.19<br>dz -<br>(+) 24                                             | 0.25                                                    | nc                          | nc                          | nc                          |
| PAO1 C, day 10 | 0,19<br>dz -<br>(-)                                                | -                                                       | -                           | -                           | -                           |
| PAO1 A, day 17 | 0.19<br>dz -<br>(++) 4                                             | 0.25                                                    | nc                          | nc                          | nc                          |
| PAO1 B, day 17 | 0.19<br>dz -<br>(++) 6                                             | 0.25<br>(+)0.5                                          | nc                          | nc                          | nc                          |
| PAO1 C, day 17 | 0.19<br>dz -<br>(+) 0.38                                           | 0.75<br>dz 6                                            | nc                          | nc                          | nc                          |
| PAO1 A, day 24 | 0.19<br>dz -<br>(++) 32                                            | 1.5                                                     | nc                          | nc                          | nc                          |
| PAO1 B, day 24 | 0.19<br>dz -<br>(++) 3                                             | 1<br>dz 8                                               | nc                          | nc                          | nc                          |
| PAO1 C, day 24 | 1.5<br>dz -<br>(+++ 24                                             | 0.25                                                    | nc                          | nc                          | nc                          |
| PAO1 A, day 94 | 0.094<br>dz -<br>(++) 0.5                                          | 0.19<br>dz 6                                            | nc                          | nc                          | nc                          |
| PAO1 B, day 94 | 0.125<br>dz -<br>(+) 0.38                                          | 0.75<br>dz 6                                            | nc                          | nc                          | nc                          |
| PAO1 C, day 94 | 0.125<br>dz -<br>(+) 0.19                                          | 0.25                                                    | nc                          | nc                          | nc                          |

|                       | MIC and susceptibility of population ( $\mu\text{g/ml}$ ) | MIC of resistant colonies ( $\mu\text{g/ml}$ ) | <i>nfxB</i><br>NfxB | <i>gyrA</i><br>GyrA | <i>gyrB</i><br>GyrB |
|-----------------------|-----------------------------------------------------------|------------------------------------------------|---------------------|---------------------|---------------------|
| <i>mutS</i> start     | 0.19, dz -, (+++)                                         | -                                              | nc                  | nc                  | nc                  |
| <i>mutS</i> A, day 3  | 0.19<br>dz -<br>(+++) <sup>3</sup>                        | 8                                              | T518C<br>Leu/Pro    | nc                  | nc                  |
| <i>mutS</i> B, day 3  | 0.19<br>dz -<br>(+++) <sup>2</sup>                        | 8                                              | T86C<br>Leu/Pro     | nc                  | nc                  |
| <i>mutS</i> C, day 3  | 0.125<br>dz -<br>(++) <sup>1</sup>                        | 12                                             | T530C<br>Phe/Ser    | -                   | nc                  |
| <i>mutS</i> A, day 10 | 0.25<br>dz -<br>(+++) <sup>2</sup>                        | 8                                              | T41C<br>Leu/Pro     | -                   | nc                  |
| <i>mutS</i> B, day 10 | 0.19<br>dz -<br>(+++) <sup>6</sup>                        | 24                                             | nc                  | nc                  | nc                  |
| <i>mutS</i> C, day 10 | 0.19<br>dz -<br>(+++) <sup>2</sup>                        | >32                                            | -                   | nc                  | nc                  |
| <i>mutS</i> A, day 17 | 0.19<br>dz -<br>(+++) <sup>3</sup>                        | 12                                             | T77C<br>Leu/Pro     | nc                  | nc                  |
| <i>mutS</i> B, day 17 | 0.19<br>dz -<br>(+++) <sup>2</sup>                        | 8                                              | -                   | nc                  | nc                  |
| <i>mutS</i> C, day 17 | 0.19<br>dz -<br>(+++) <sup>4</sup>                        | 8-24                                           | nc                  | nc                  | nc                  |
| <i>mutS</i> A, day 24 | 0.25<br>dz -<br>(+++) <sup>2</sup>                        | 32                                             | nc                  | C248T<br>Thr/Ile    | nc                  |
| <i>mutS</i> B, day 24 | 0.25<br>dz -<br>(+++) <sup>4</sup>                        | 32                                             | -                   | C248T<br>Thr/Ile    | nc                  |
| <i>mutS</i> C, day 24 | 0.19<br>dz -<br>(+++) <sup>2</sup>                        | 24                                             | nc                  | C248T<br>Thr/Ile    | nc                  |
| <i>mutS</i> A, day 94 | 0.94<br>dz -<br>(+++) <sup>1</sup>                        | 32                                             | nc                  | C248T<br>Thr/Ile    | nc                  |
| <i>mutS</i> B, day 94 | 0.125<br>dz -<br>(+++) <sup>0.75</sup>                    | 8                                              | -                   | C248T<br>Thr/Ile    | nc                  |
| <i>mutS</i> C, day 94 | 0.125<br>dz -<br>(+++) <sup>1.5</sup>                     | 8                                              | nc                  | C248T<br>Thr/Ile    | nc                  |

|                        | MIC and susceptibility of population (µg/ml) | MIC of resistant colonies (µg/ml) | <i>nfxB</i><br>NfxB        | <i>gyrA</i><br>GyrA  | <i>gyrB</i><br>GyrB |
|------------------------|----------------------------------------------|-----------------------------------|----------------------------|----------------------|---------------------|
| <i>mutMY</i> start     | 0,19<br>dz -<br>(+++)<br>2                   | 2<br>dz -<br>(+)<br>3             | nc                         | nc                   | nc                  |
| <i>mutMY</i> A, day 3  | 0.19<br>dz -<br>(+++)<br>6                   | 8                                 | <i>G475T</i><br>Stop codon | nc                   | nc                  |
| <i>mutMY</i> B, day 3  | 0.19<br>dz -<br>(++)<br>1.5                  | 12                                | <i>G214T</i><br>Stop codon | nc                   | nc                  |
| <i>mutMY</i> C, day 3  | 0.19<br>dz -<br>(++)<br>1.5                  | 8                                 | ND                         | nc                   | nc                  |
| <i>mutMY</i> A, day 10 | 0.19<br>dz -<br>(+++)<br>1.5                 | 8                                 | <i>C124A</i><br>Arg/Ser    | nc                   | nc                  |
| <i>mutMY</i> B, day 10 | 0.19<br>dz -<br>(+++)<br>2                   | 8                                 | ND                         | nc                   | nc                  |
| <i>mutMY</i> C, day 10 | 0.19<br>dz -<br>(++)<br>1.5                  | 8                                 | nc                         | nc                   | nc                  |
| <i>mutMY</i> A, day 17 | 0.19<br>dz -<br>(+++)<br>4                   | 8                                 | ND                         | nc                   | nc                  |
| <i>mutMY</i> B, day 17 | 0.19<br>dz -<br>(+++)<br>2                   | 8                                 | <i>C124A</i><br>Arg/Ser    | nc                   | nc                  |
| <i>mutMY</i> C, day 17 | 0.19<br>dz -<br>(++)<br>1                    | 8                                 | <i>G175T</i><br>Stop codon | nc                   | nc                  |
| <i>mutMY</i> A, day 24 | 0.19<br>dz -<br>(+++)<br>12                  | 8-12                              | nc                         | nc                   | nc                  |
| <i>mutMY</i> B, day 24 | 0.19<br>dz -<br>(+++)<br>2                   | 8                                 | G91T<br>Stop codon         | nc                   | nc                  |
| <i>mutMY</i> C, day 24 | 0.19<br>dz -<br>(+++)<br>2                   | 8                                 | ND                         | nc                   | nc                  |
| <i>mutMY</i> A, day 94 | 0.064<br>dz -<br>(++)<br>0.75                | 12                                | nc                         | <i>G259T</i><br>D87Y | nc                  |
| <i>mutMY</i> B, day 94 | 0.047<br>dz -<br>(++)<br>0.75                | 4<br>(++)<br>12                   | nc                         | nc                   | nc                  |
| <i>mutMY</i> C, day 94 | 0.047<br>dz -<br>(++)<br>0.5                 | 0.75<br>(+++)<br>8                | nc                         | <i>G259T</i><br>D87Y | nc                  |

dz = double zone, - = not determined, nc = no change.

Supplementary table 2. MIC-values and sequencing results for individual ciprofloxacin resistant colonies isolated from the populations of PAO1, PAO $\Delta$ mutS (*mutS*) and PAOMY-Mgm (*mutMY*) after 94 days evolution in the presence of 0,05 $\mu$ g/mL ciprofloxacin and from the start population of PAO $\Delta$ mutS (*mutS*) and PAOMY-Mgm (*mutMY*) (pre-existent resistant subpopulations) (lineage A). nc= no change

|                       | MIC<br>( $\mu$ g/mL) | <i>nfxB</i><br>NfxB | <i>gyrA</i><br>GyrA | <i>gyrB</i><br>GyrB | <i>parC</i><br>ParC | <i>parE</i><br>ParE |
|-----------------------|----------------------|---------------------|---------------------|---------------------|---------------------|---------------------|
| PAO1 A-1, Cip, day 94 | 16                   | -                   | C248T<br>T83I       | nc                  | -                   | -                   |
| PAO1 A-2, Cip, day 94 | 8                    | -                   | C248T<br>T83I       | nc                  | -                   | -                   |
| PAO1 A-3, Cip, day 94 | 8                    | -                   | C248T<br>T83I       | nc                  | -                   | -                   |
| PAO1 A-4, Cip, day 94 | 8                    | -                   | C248T<br>T83I       | nc                  | -                   | -                   |
| PAO1 A-5, Cip, day 94 | 16                   | -                   | C248T<br>T83I       | nc                  | -                   | -                   |
| PAO1 A-6, Cip, day 94 | 16                   | -                   | C248T<br>T83I       | nc                  | -                   | -                   |
| PAO1 A-7, Cip, day 94 | 16                   | -                   | C248T<br>T83I       | nc                  | -                   | -                   |

|                              | MIC<br>( $\mu$ g/mL) | <i>nfxB</i><br>NfxB | <i>gyrA</i><br>GyrA | <i>gyrB</i><br>GyrB | <i>parC</i><br>ParC | <i>parE</i><br>ParE |
|------------------------------|----------------------|---------------------|---------------------|---------------------|---------------------|---------------------|
| <i>mutS</i> start-1          | 3                    | nc                  | C248T<br>T83I       | nc                  | -                   | -                   |
| <i>mutS</i> start-2          | 3                    | nc                  | C248T<br>T83I       | nc                  | -                   | -                   |
| <i>mutS</i> start-3          | 3                    | nc                  | C248T<br>T83I       | -                   | -                   | -                   |
| <i>mutS</i> start-4          | 2                    | nc                  | C248T<br>T83I       | nc                  | -                   | -                   |
| <i>mutS</i> start-5          | 4                    | nc                  | C248T<br>T83I       | nc                  | -                   | -                   |
| <i>mutS</i> start-6          | 3                    | nc                  | C248T<br>T83I       | nc                  | -                   | -                   |
| <i>mutS</i> A-1, Cip, day 94 | 64-128               | nc                  | C248T<br>T83I       | nc                  | C260T<br>S87L       | -                   |
| <i>mutS</i> A-2, Cip, day 94 | 64-128               | nc                  | C248T<br>T83I       | nc                  | C260T<br>S87L       | -                   |
| <i>mutS</i> A-3, Cip, day 94 | 64-128               | nc                  | C248T<br>T83I       | nc                  | C260T<br>S87L       | -                   |
| <i>mutS</i> A-4, Cip, day 94 | 64-128               | nc                  | C248T<br>T83I       | nc                  | nc                  | -                   |
| <i>mutS</i> A-5, Cip, day 94 | 64-128               | nc                  | C248T<br>T83I       | nc                  | nc                  | -                   |
| <i>mutS</i> A-6, Cip, day 94 | 64-128               | nc                  | C248T<br>T83I       | nc                  | nc                  | -                   |

|                               | <b>MIC<br/>(µg/mL)</b> | <b><i>nfxB</i><br/>NfxB</b> | <b><i>gyrA</i><br/>GyrA</b> | <b><i>gyrB</i><br/>GyrB</b> | <b><i>parC</i><br/>ParC</b> | <b><i>parE</i><br/>ParE</b> |
|-------------------------------|------------------------|-----------------------------|-----------------------------|-----------------------------|-----------------------------|-----------------------------|
| <i>mutMY</i> start-1          | -                      | nc                          | nc                          | nc                          | -                           | -                           |
| <i>mutMY</i> start-2          | 4                      | <i>G125T</i><br>R42L        | nc                          | nc                          | -                           | -                           |
| <i>mutMY</i> start-3          | 4                      | <i>G539T</i><br>G180V       | nc                          | nc                          | -                           | -                           |
| <i>mutMY</i> start-4          | 4                      | <i>G539T</i><br>G180V       | nc                          | nc                          | -                           | -                           |
| <i>mutMY</i> start-5          | 4                      | nc                          | nc                          | <i>C2246A</i><br>P749H      | -                           | -                           |
| <i>mutMY</i> start-6          | 6                      | <i>G172T</i><br>stop        | nc                          | nc                          | -                           | -                           |
| <i>mutMY</i> A-1, Cip, day 94 | 16                     | -                           | nc                          | <i>C1397A</i><br>S466Y      | -                           | -                           |
| <i>mutMY</i> A-2, Cip, day 94 | 8                      | -                           | nc                          | <i>C1397A</i><br>S466Y      | -                           | -                           |
| <i>mutMY</i> A-3, Cip, day 94 | < 4                    | -                           | nc                          | <i>C1397A</i><br>S466Y      | -                           | -                           |
| <i>mutMY</i> A-4, Cip, day 94 | 8                      | -                           | nc                          | <i>C1397A</i><br>S466Y      | -                           | -                           |
| <i>mutMY</i> A-5, Cip, day 94 | 8-16                   | -                           | nc                          | <i>C1397A</i><br>S466Y      | -                           | -                           |
| <i>mutMY</i> A-6, Cip, day 94 | 16                     | -                           | nc                          | <i>C1397A</i><br>S466Y      | -                           | -                           |
| <i>mutMY</i> A-7, Cip, day 94 | 16                     | -                           | nc                          | <i>C1397A</i><br>S466Y      | -                           | -                           |
| <i>mutMY</i> A-8, Cip, day 94 | 8                      | -                           | nc                          | <i>C1397A</i><br>S466Y      | -                           | -                           |
| <i>mutMY</i> A-9, Cip, day 94 | 8                      | -                           | nc                          | <i>C1397A</i><br>S466Y      | -                           | -                           |

- = not determined, nc = no change



Supplementary table 3. Susceptibility to ceftazidime, meropenem and tobramycin of the start strains and C-lines of PAO1, PAO $\Delta$ mutS (*mutS*) and PAOMY-Mgm (*mutMY*) populations that evolved in the presence or absence of 0.05  $\mu$ g/mL ciprofloxacin.

|                             | Ceftazidime ( $\mu$ g/mL)            |                             | Meropenem ( $\mu$ g/mL)              |                         | Tobramycin ( $\mu$ g/mL)             |                       |
|-----------------------------|--------------------------------------|-----------------------------|--------------------------------------|-------------------------|--------------------------------------|-----------------------|
|                             | with ciprofloxacin (0.05 $\mu$ g/mL) | without ciprofloxacin       | with ciprofloxacin (0.05 $\mu$ g/mL) | without ciprofloxacin   | with ciprofloxacin (0.05 $\mu$ g/mL) | without ciprofloxacin |
| PAO1 start                  | -                                    | 1.5, dz <sup>a</sup> -, (-) | -                                    | 0.094, dz -, (-)        | -                                    | 1.5, dz -, (-)        |
| PAO1 C, day 3               | 1.5, dz 8, (+) 12                    | 2, dz -, (-)                | 0.094, dz -, (++) 0.38               | 0.094, dz -, (-)        | 1.5, dz -, (-)                       | 1.5, dz -, (-)        |
| PAO1 C, cip, day 10         | 2, dz -, (-)                         | 2, dz -, (-)                | 0.125, dz -, (+) 0.25                | 0.094, dz -, (-)        | 1.5, dz -, (-)                       | 1.5, dz -, (-)        |
| PAO1 C, cip, day 17         | 2, dz -, (++) 4                      | 2, dz -, (-)                | 0.094, dz -, (+) 0.25                | 0.094, dz -, (-)        | 1.5, dz -, (-)                       | 1.5, dz -, (-)        |
| PAO1 C, cip, day 24         | 2, dz -, (++) 4                      | 2, dz -, (-)                | 0.094, dz -, (++) 0.5                | 0.094, dz -, (-)        | 1.5, dz -, (-)                       | 1.5, dz -, (-)        |
| PAO1 C, cip, day 94         | 4, dz -, (-)                         | 2.5, dz -, (-)              | 0.064, dz 0.25, (+) 8                | 0.094, dz -, (-)        | 1.5, dz -, (-)                       | 1.5, dz -, (-)        |
| <i>mutS</i> start           | -                                    | 2, dz -, (++) 3             | -                                    | 0.094, dz -, (+++) 0.25 | -                                    | 1.5, dz -, (-)        |
| <i>mutS</i> C, Cip, day 3   | 2, dz -, (++) 6                      | 1.5, dz -, (-)              | 0.094, dz -, (+++) 0.5               | 0.125, dz -, (-)        | 1.5, dz -, (-)                       | 1.5, dz -, (-)        |
| <i>mutS</i> C, Cip, day 10  | 2, dz -, (+++) 8                     | 3, dz -, (+) 8              | 0.094, dz -, (+++) 1.5               | 0.125, dz -, (++) 0.25  | 1.5, dz -, (+) 2                     | 1.5, dz -, (-)        |
| <i>mutS</i> C, Cip, day 17  | 2, dz -, (+++) 16                    | 3, dz -, (+) 6              | 0.094, dz -, (+++) 0.75              | 0.094, dz -, (++) 1.5   | 1.5, dz -, (+) 2                     | 1.5, dz -, (-)        |
| <i>mutS</i> C, Cip, day 24  | 2, dz -, (+++) 8                     | 3, dz -, (++) 4             | 0.094, dz -, (+++) 8                 | 0.094, dz -, (++) 0.38  | 1.5, dz -, (-)                       | 1.5, dz -, (-)        |
| <i>mutS</i> C, Cip day 94   | 1, dz -, (+++) 12                    | 1.5, dz -, (++) 4           | 0.094, dz -, (+++) 3                 | 0.094, dz -, (++) 0.75  | 1.5, dz -, (-)                       | 2, dz -, (-)          |
| <i>mutMY</i> start          | -                                    | 1.5, dz 2, (+) 4            | -                                    | 0.094, dz -, (++) 0.5   | -                                    | 1.5, dz -, (-)        |
| <i>mutMY</i> C, Cip, day 3  | 1.5, dz 8, (-)                       | 2, dz -, (-)                | 0.094, dz 0.19, (++) 2               | 0.094, dz -, (++) 0.25  | 2, dz -, (-)                         | 1.5, dz -, (-)        |
| <i>mutMY</i> C, Cip, day 10 | 2, dz -, (++) 6                      | 2, dz -, (+) 3              | 0.094, dz -, (++) 0.75               | 0.094, dz -, (+) 0.19   | 1.5, dz -, (-)                       | 1.5, dz -, (-)        |
| <i>mutMY</i> C, Cip, day 17 | 2, dz -, (++) 6                      | 3, dz -, (+) 4              | 0.094, dz -, (++) 1.0                | 0.094, dz -, (++) 0.25  | 1.5, dz -, (-)                       | 1.5, dz -, (-)        |
| <i>mutMY</i> C, Cip, day 24 | 2, dz -, (++) 6                      | 2, dz -, (+) 3              | 0.094, dz -, (+++) 1.0               | 0.094, dz -, (++) 1     | 1.5, dz -, (-)                       | 1.5, dz -, (-)        |
| <i>mutMY</i> C, Cip, day 94 | 2, dz 4, (+) 6                       | 1.5, dz -, (+) 4            | 0.094, dz 0.125, (++) 1.5            | 0.094, dz -, (++) 0.75  | 1.5, dz -, (+) 3                     | 1.5, dz -, (-)        |

<sup>a</sup>dz = double zone

Supplementary table 4. Determination of colonies with lack of growth on glucose minimal media (possible auxotrophs) in PAO1, PAO $\Delta$ mutS (*mutS*) and PAOMY-Mgm (*mutMY*) bacterial populations that have evolved in the presence and absence of ciprofloxacin for 24 and 94 days.

|                            | Number of colonies on M9 plates | Number of colonies on LB plates | % possible auxotrophs |
|----------------------------|---------------------------------|---------------------------------|-----------------------|
| PAO1 start                 | 50                              | 50                              | 0                     |
| <i>mutS</i> start          | 50                              | 50                              | 0                     |
| <i>mutMY</i> start         | 50                              | 50                              | 0                     |
| PAO1 A Cip, day 24         | 50                              | 50                              | 0                     |
| PAO1 B Cip, day 24         | 50                              | 50                              | 0                     |
| PAO1 C Cip, day 24         | 49                              | 50                              | 2                     |
| <i>mutS</i> A Cip, day 24  | 49                              | 50                              | 2                     |
| <i>mutS</i> B Cip, day 24  | 50                              | 50                              | 0                     |
| <i>mutMY</i> A Cip, day 24 | 50                              | 50                              | 0                     |
| <i>mutMY</i> B Cip, day 24 | 50                              | 50                              | 0                     |
| <i>mutMY</i> C Cip, day 24 | 48                              | 50                              | 4                     |
| PAO1 A, day 24             | 50                              | 50                              | 0                     |
| PAO1 B, day 24             | 50                              | 50                              | 0                     |
| PAO1 C, day 24             | 50                              | 50                              | 0                     |
| <i>mutS</i> A, day 24      | 49                              | 50                              | 2                     |
| <i>mutS</i> B, day 24      | 41                              | 50                              | 18                    |
| <i>mutS</i> C, day 24      | 50                              | 50                              | 0                     |
| <i>mutMY</i> A, day 24     | 50                              | 50                              | 0                     |
| <i>mutMY</i> B, day 24     | 50                              | 50                              | 0                     |
| <i>mutMY</i> C, day 24     | 50                              | 50                              | 0                     |
| PAO1 A Cip, day 94         | 50                              | 50                              | 0                     |
| PAO1 B Cip, day 94         | 47                              | 50                              | 6                     |
| PAO1 C Cip, day 94         | 50                              | 50                              | 0                     |
| <i>mutS</i> A Cip, day 94  | 48                              | 50                              | 4                     |
| <i>mutS</i> B Cip, day 94  | 48                              | 50                              | 4                     |
| <i>mutS</i> C Cip, day 94  | 50                              | 50                              | 0                     |
| <i>mutMY</i> A Cip, day 94 | 50                              | 50                              | 0                     |
| <i>mutMY</i> B Cip, day 94 | 46                              | 50                              | 8                     |
| <i>mutMY</i> C Cip, day 94 | 50                              | 50                              | 0                     |
| <i>mutS</i> A, day 94      | 50                              | 50                              | 0                     |
| <i>mutS</i> B, day 94      | 50                              | 50                              | 0                     |
| <i>mutS</i> C, day 94      | 29                              | 50                              | 42                    |
| <i>mutMY</i> A, day 94     | 9                               | 50                              | 72                    |
| <i>mutMY</i> B, day 94     | 50                              | 50                              | 0                     |
| <i>mutMY</i> C, day 94     | 49                              | 50                              | 2                     |
